# Supplementary material for: A proteomic study of mitotic phase-specific interactors of EB1 reveals a role for SXIP-mediated protein interactions in anaphase onset
Source: Biol Open. 2015 Jan 16;4(2):155–69. doi: 10.1242/bio.201410413 (PMC4365484; doi:10.1242/bio.201410413)
Supplement: Supplementary Material [file supp_bio.201410413_bio.201410413-s1.pdf]

Supplementary Material  
Naoka Tamura et al. doi: 10.1242/bio.201410413

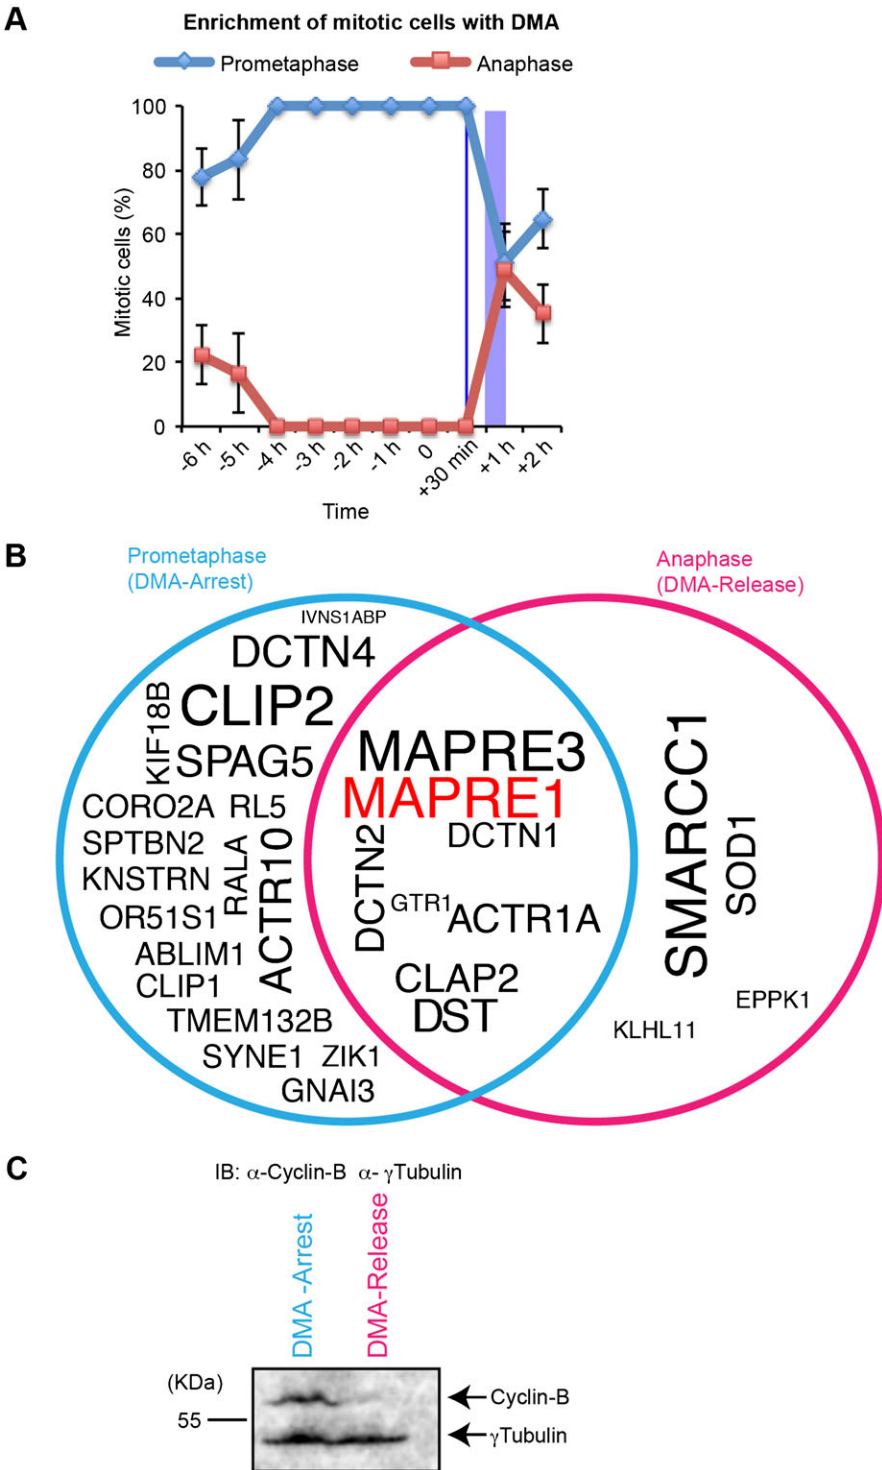

**Fig. S1. Mitotic phase-specific enrichment of EB1 interactors.** (A) Graph showing the percentage of cells in distinct mitotic phases following DMA treatment (DMA-arrest) and release from DMA treatment (DMA-release). In plastic dishes UTA6 cells were cultured and prometaphase (Prometa) and anaphase (Ana) cells were counted by DIC microscopy at each time point ( $n=300$  cells). Mitotic cells (Mito) represent a total number of 'rounded-up' prometaphase cells and 'elongated' anaphase cells. Cells were synchronized by double thymidine blocks and treated using DMA ( $5\text{ }\mu\text{M}$ ) for 6 h. DMA was removed by serial-washing and the cells were released into drug free DMEM media for 2 h. Vertical blue line represents time-point for shaking-off prometaphase cells for large-scale immunoprecipitations. Vertical box in purple refers to harvesting time-point for anaphase cells (a box is chosen as the time period includes five brief washes of three minute centrifuge-runs to thoroughly wash-off DMA, which was followed by a 45 minute DMA-free incubation period). On the X-axis, prometaphase harvesting time-point as  $T=0$ . Note that the percentages were derived from non-shaken-off cell cultures on plastic dishes, hence is an under-estimate of mitotic enrichment efficiency. (B) Venn diagram showing EB1 interactors in DMA-arrested (Blue circle), -released (Pink circle) or both (overlapped region) immunoprecipitations. Compared to Fig. 1F, this diagram presents a high stringency cut-off to isolate EB1 specific interactors. Diagram excludes proteins found even once in any of the Flag-Nuf2 IPs and includes proteins found in Flag-EB1 IPs at least twice. Font size in each area of the circle reflects reproducibility across repeats. Bait is highlighted red. (C) Immunoblots showing reduction in Cyclin-B levels in lysates of prometaphase (DMA-arrest) compared to anaphase (DMA-release) UTA6 Flag-EB1 cells. Immunoblots were probed with  $\alpha$ -CyclinB1 and  $\alpha$ - $\gamma$ Tubulin antibodies. Lysates are from a batch-matched experiment shown in Fig. 2A.

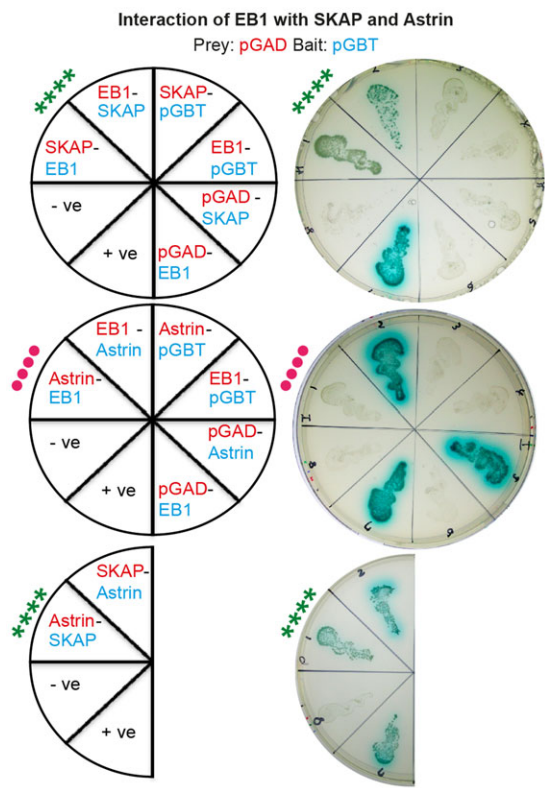

**Fig. S2. Yeast two hybrid study showing the lack of interaction between EB1 and Astrin.** Yeast strains carrying plasmids encoding EB1, SKAP or Astrin are indicated on pie chart (left). Positive interaction was assessed through the activation of the *lacZ* reporter gene which was demonstrated by the formation of blue colonies on plates containing X-Gal. Photographs of colonies (right) show a positive interaction between EB1 and SKAP or SKAP and Astrin (blue colour development; marked \*\*\*\* in green) and absence of interaction between EB1 and Astrin (no blue colour development; marked \*\*\* in red). The interaction of SV40-p53 and SV40-Laminin were used as positive (+ve) and negative (-ve) controls, respectively.

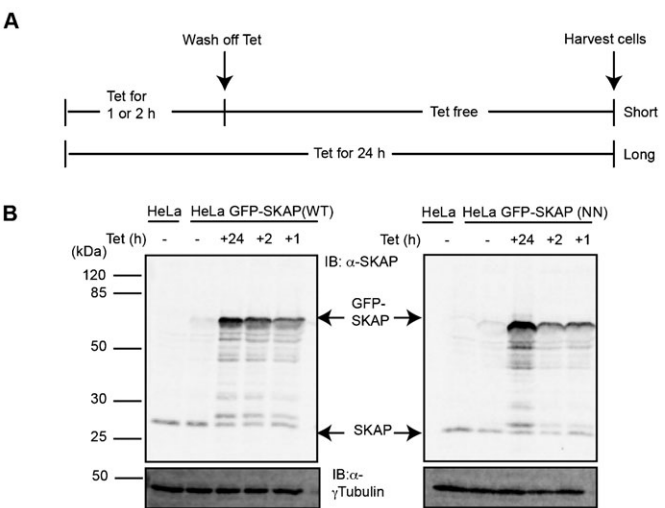

**Fig. S3. GFP-tagged SKAP (WT) and SKAP (NN) mutant protein expression levels are comparable and not different.** (A) Schematic describing Tetracycline induction in HeLa<sup>GFP-SKAP(WT)</sup> or HeLa<sup>GFP-SKAP(NN)</sup> cell line. Cells were treated with Tetracycline (Tet) for a long period (24 h), or short period (2 or 1 h). For short treatments, Tet was washed off and the cells were maintained in Tet-free media for up to 24 h. (B) Immunoblots showing similar levels of GFP-SKAP(WT) or GFP-SKAP(NN) in lysates of cells treated with Tetracycline (Tet) as illustrated in (A). Lysates were subjected to immunoblotting using α-SKAP and α-γTubulin antibodies. γTubulin was loaded as control. Endogenous SKAP and GFP-tagged SKAP are marked with arrows. HeLa cell lysates were loaded as control showing the absence of GFP-SKAP.
